# Supplementary material
Source: publisher figshare collection journal article supplement (https://acs.figshare.com/ndownloader/files/3703207)
Supplement: Supplementary file 1 [file 3703207]

## Supporting Information

### Identification of Novel GPR55 Modulators Using Cell-Impedance-Based Label-Free Technology

Paula Morales,<sup>#</sup> Lauren Whyte,<sup>¶</sup> Roberto Chicharro,<sup>#,†</sup> María Gómez-Cañas,<sup>§,§,£</sup> M. Ruth Pazos,<sup>§,§,£</sup> Pilar Goya,<sup>#</sup> Andrew J. Irving,<sup>‡</sup> Javier Fernández-Ruiz,<sup>§,§,£</sup> Ruth A. Ross,<sup>¶,\*</sup> and Nadine Jagerovic<sup>#,\*</sup>

#### TABLE OF CONTENTS

|                                                                                                                    | page  |
|--------------------------------------------------------------------------------------------------------------------|-------|
| Conformational analysis and electrostatic potential map calculations.                                              | S2    |
| <i>In silico</i> ADME properties of the new synthesized compounds <b>13–16</b> and <b>18–24</b> .                  | S3    |
| Impedance-based cellular assays in hGPR55-HEK29 cells using xCELLigence system:                                    |       |
| - Concentration-response curves of <b>19b</b> , <b>20b</b> , <b>22</b> , <b>23</b> , and <b>24</b> compared to LPI | S4    |
| - Concentration-response curves of LPI in presence of <b>22–24</b>                                                 | S5    |
| Chemistry: Supporting Information. Synthesis of compounds <b>2</b> , <b>3</b> and <b>4</b> .                       | S6-S7 |

### Conformational analysis and electrostatic potential map calculation.

Previous to the synthesis of our two proposed series of compounds (series I and series II), conformational analysis of two pyrazole isomers from each series was performed using ab initio Hartree-Fock (HF) calculations at the 6-31G\* level within the Spartan '08 (Wave function, Inc., Irvine, CA). A conformational search was next implemented using Molecular Mechanics (Monte Carlo method). Local energy minima was identified by rotation of a subject torsion angle through 360 in 60 increments (6-fold search), followed by HF 6-31G\* energy minimization of each rotamer generated. The electrostatic potential of the global minimum energy conformer was calculated using the Hartree-Fock method at the 6-31G\* level of theory and was mapped on the 0.002 isodensity surface of each molecule. The surface was color-coded according to the potential, with electron rich regions colored red and electron poor regions colored blue.

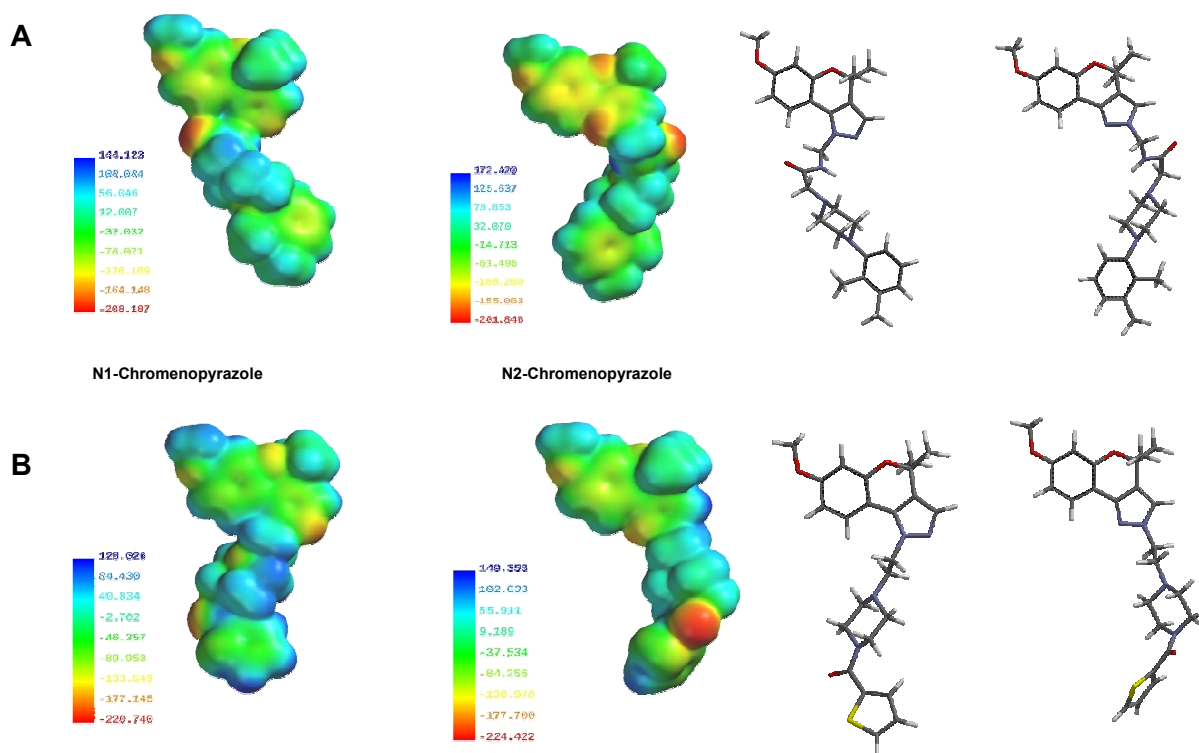

**Figure S1:** A) N1- and N2-(4-(2,3-dimethylphenyl)piperazinyl)acetamidomethyl chromenopyrazole (Series I) electrostatic potential maps and minimized conformers used to calculate the map. B) N1- and N2-(4-(2-thenoyl)piperazinyl)ethylchromenopyrazole (Series II) electrostatic potential maps and minimized conformers used to calculate the map. The electrostatic potential scale (in kJ/mol) is provided as a color scale. This scale is from blue (most electropositive) to red (most electronegative).

In a first approximation, this study suggests the inverted-L shape adopted by compounds from both series with a high electronegative region nearby the chromenopyrazole head region for series I corresponding to the amide carbonyl group, and a high electronegative region located in the end of the central area for series II corresponding to the acyl carbonyl group. These structural features agree with Reggio's data. They suggested GPR55 agonism for compounds of series I

and GPR55 antagonism for series II. Therefore, chromenopyrazole as scaffold was expected to be attractive.

### ***In silico* ADME properties.**

**Table S1.** Physicochemical descriptors calculated by QikProp 3.5 integrated in Maestro (Schrödinger, LLC, New York, USA) [range of 95% of drugs].

| Compd      | QPlogS <sup>a</sup> | QlogBB <sup>b</sup> | QPlogHERG <sup>c</sup> | QPPCaco <sup>d</sup> | %Human oral absorption GI <sup>e</sup> |
|------------|---------------------|---------------------|------------------------|----------------------|----------------------------------------|
| <b>13a</b> | -4.8                | 0.11                | -5.803                 | 529                  | 100                                    |
| <b>13b</b> | -4.7                | 0.10                | -6.064                 | 504                  | 100                                    |
| <b>14a</b> | -4.8                | 0.05                | -5.588                 | 529                  | 100                                    |
| <b>14b</b> | -4.7                | 0.04                | -5.842                 | 504                  | 100                                    |
| <b>15a</b> | -5.5                | 0.10                | -5.543                 | 529                  | 100                                    |
| <b>15b</b> | -5.5                | 0.09                | -5.789                 | 504                  | 100                                    |
| <b>16</b>  | -4.5                | 0.06                | -5.395                 | 529                  | 100                                    |
| <b>18a</b> | -4.1                | -0.05               | -6.779                 | 559                  | 100                                    |
| <b>18b</b> | -4.1                | 0.08                | -7.051                 | 774                  | 100                                    |
| <b>19a</b> | -4.7                | 0.01                | -7.076                 | 641                  | 100                                    |
| <b>19b</b> | -5.2                | 0.08                | -7.524                 | 796                  | 100                                    |
| <b>20a</b> | -4.8                | 0.12                | -6.755                 | 642                  | 100                                    |
| <b>20b</b> | -4.9                | 0.25                | -7.085                 | 880                  | 100                                    |
| <b>21</b>  | -4.4                | 0.03                | -6.334                 | 589                  | 100                                    |
| <b>22</b>  | -2.9                | 0.13                | -5.028                 | 512                  | 89                                     |
| <b>23</b>  | -4.6                | 0.30                | -5.133                 | 832                  | 100                                    |
| <b>24</b>  | -3.9                | 0.27                | -5.041                 | 750                  | 100                                    |
| LPI        | -3.4                | -4.84               | -4.139                 | 5                    | 11                                     |

<sup>a</sup>Predicted aqueous solubility [-6.5/0.5]; <sup>b</sup>Predicted log of the brain/blood partition coefficient [-3.0/1.2]; <sup>c</sup>HERG K<sup>+</sup> Channel Blockage (log IC<sub>50</sub>) [concern below -5]; <sup>d</sup>Apparent Caco-2 cell permeability in nm/s [<25 poor, >500 excellent]; <sup>e</sup>Human Oral Absorption in GI [<25% is poor].

**Impedance-based cellular assays: Concentration-response curves of 19b, 20b, 22, 23, and 24 compared to LPI; Concentration-response curves of LPI in presence of 2224 in hGPR55-HEK293 cells using xCELLigence system.**

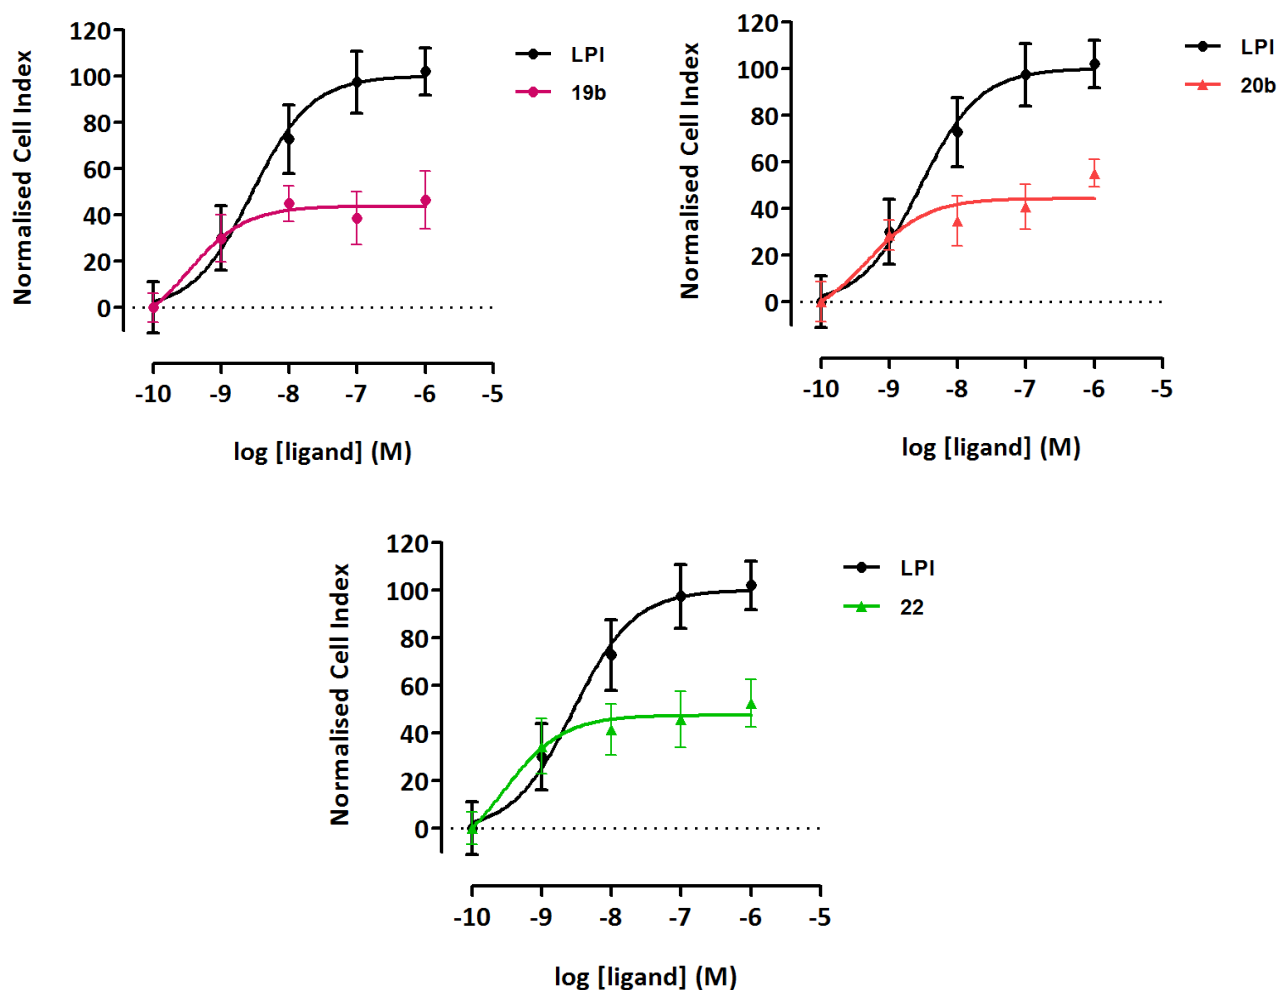

**Figure S2.** A. Concentration-response curves of **19b** (upper right), **20b** (upper left), and **22** (lower) in hGPR55-HEK293 cells using xCELLigence system. Data points represent the mean  $\pm$  SEM values of four independent experiments, performed in duplicate. The data is presented as a percentage of the maximal LPI stimulation (at 1  $\mu$ M, LPI displays off-target activity at 10  $\mu$ M).

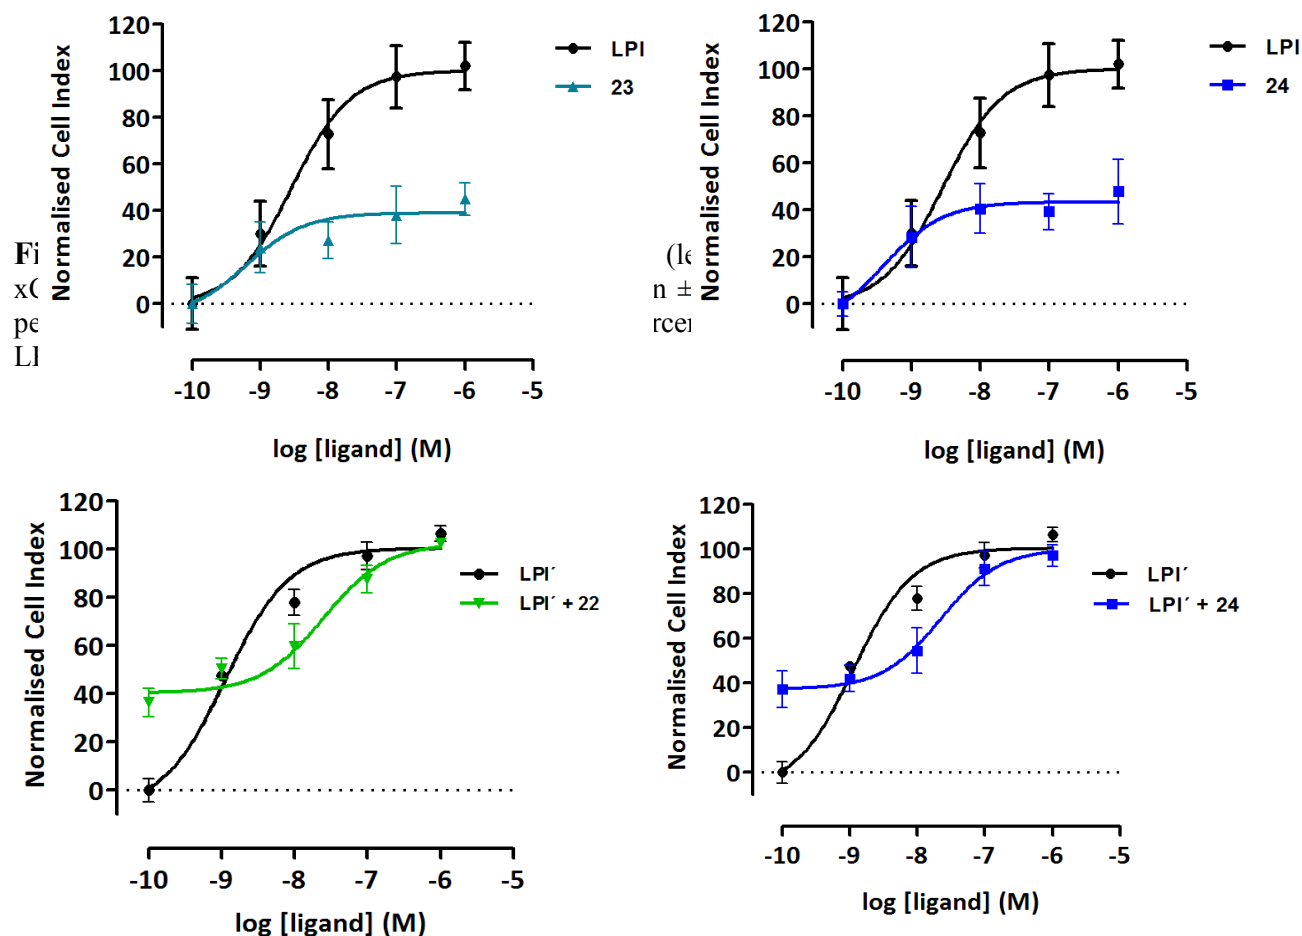

**Figure S4.** Concentration-response curves of LPI in the presence and absence of **22** (left) and **24** (right) in hGPR55-HEK293 cells using xCELLigence system. Data points represent the mean  $\pm$  SEM values of at least four independent experiments, performed in duplicate. The data is presented as a percentage of the maximal LPI stimulation.

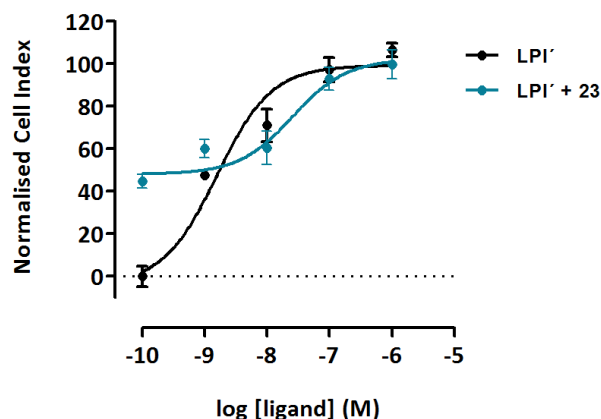

**Figure S5.** Concentration-response curves of LPI in the presence and absence of **23** in hGPR55-HEK293 cells using xCELLigence system. Data points represent the mean  $\pm$  SEM values of at least four independent experiments, performed in duplicate. The data is presented as a percentage of the maximal LPI stimulation.

### Chemistry: Supporting Information

**7-Methoxy-2,2-dimethylchroman-4-one (2).**<sup>1</sup> To a solution of 2-hydroxy-4-methoxyacetophenone (3.01 g, 18.0 mmol) in ethanol (30 mL) and acetone (13.2 mL, 180.5 mmol), pyrrolidine (4.5 mL, 54.2 mmol) was added in one portion. The mixture was refluxed for 6 h. After reaction completion, the solvent was removed under reduced pressure. The resultant crude was diluted by EtOAc and washed with aqueous  $\text{NH}_4\text{Cl}$  solution and brine. The aqueous layer was extracted with EtOAc three times. The combined organic layer was dried over anhydrous  $\text{MgSO}_4$ , filtered and the solvent was condensed under vacuum. Column chromatography on silica gel (hexane/ EtOAc, 3:1) provided the desired product as a yellow solid (3.04 g, 82%); mp: 81–83°C (82–83°C);<sup>2</sup>  $^1\text{H-NMR}$  (400 MHz,  $\text{CDCl}_3$ )  $\delta$ : 7.78 (d,  $J$  = 8.8 Hz, 1H, 5-H), 6.52 (dd,  $J$  = 8.8, 2.4 Hz, 1H, 6-H), 6.36 (d,  $J$  = 2.4 Hz, 1H, 8-H), 3.81 (s, 3H,  $\text{OCH}_3$ ), 2.66 (s, 2H, 3-H), 1.44 ppm (s, 6H,  $\text{OC}(\text{CH}_3)_2$ );  $^{13}\text{C-NMR}$  (101 MHz,  $\text{CDCl}_3$ )  $\delta$ : 191.3 (4-C), 166.4 (7-C), 162.2 (8a-C), 128.4 (5-C), 114.3 (4a-C), 109.5 (8-C), 101.3 (6-C), 79.8 (2-C), 55.8 ( $\text{OCH}_3$ ), 48.8 (3-C), 26.9 ppm ( $\text{OC}(\text{CH}_3)_2$ ); HPLC-MS: [A, 15 $\rightarrow$ 95%],  $t_R$ : 4.55 min, (100%); MS ( $\text{ES}^+$ ,  $m/z$ ) 207 [ $\text{M} + \text{H}$ ] $^+$ .

**3-(Hydroxymethylene)-7-methoxy-2,2-dimethylchroman-4-one (3).**<sup>3</sup> A solution of **2** (2.80 g, 13.6 mmol) in anhydrous THF (15 mL) was added to a vial containing dry sodium hydride (1.30 g, 54.4 mmol) under  $\text{N}_2$  atmosphere. The mixture was irradiated under microwave at 45°C for 25 min. Subsequently, ethyl formate (5.48 mL, 68.0 mmol) was added to the sealed vial and it was irradiated under microwave at 45°C for 25 minutes. Water was added and the product was extracted with EtOAc. The combined organic layers were dried over  $\text{Mg}_2\text{SO}_4$  and the solvent was evaporated under reduced pressure. The crude was purified by column chromatography on silica gel (hexane/ EtOAc, 3:1) to afford the title product **3** (1.46 g, 52%) as a light yellow oil:  $^1\text{H-NMR}$  (400 MHz,  $\text{CDCl}_3$ )  $\delta$ : 7.82 (d,  $J$  = 8.7 Hz, 1H, 5-H), 7.78 (d,  $J$  = 9.0 Hz, 1H,  $\text{CHOH}$ ),

6.49 (dd,  $J = 8.7, 2.1$  Hz, 1H, 6-H), 6.26 (d,  $J = 2.1$  Hz, 1H, 8-H), 3.37 (s, 3H, OCH<sub>3</sub>), 1.45 ppm (s, 6H OC(CH<sub>3</sub>)<sub>2</sub>); <sup>13</sup>C-NMR (101 MHz, CDCl<sub>3</sub>)  $\delta$ : 189.6 (4-C), 167.4 (7-C), 164.2 (CHOH), 158.9 (8a-C), 126.8 (5-C), 115.1(4a-C), 110.3 (8-C), 105.8 (6-C), 87.1 (2-C), 64.5 (OCH<sub>3</sub>), 50.9 (3-C), 25.8 ppm (OC(CH<sub>3</sub>)<sub>2</sub>); HPLC-MS: [A, 60→95%],  $t_R$ : 2.70 min, (98%); MS (ES<sup>+</sup>,  $m/z$ ) 235 [M + H]<sup>+</sup>.

**1,4-Dihydro-7-methoxy-4,4-dimethylchromeno[4,3-*c*]pyrazole (4).**<sup>4</sup> A solution of **3** (1.46 g, 6.3 mmol) and anhydrous hydrazine (0.58 mL, 18.8 mmol) in EtOH (20 mL) was stirred at 60°C during 2 h. The solvent was removed under reduced pressure, and the crude residue was subjected to silica gel column chromatography (hexane/EtOAc, 1:1) to obtain **4** as a white solid (0.99 g, 69%); mp: 158-160°C (167-169°C); <sup>1</sup>H-NMR (400 MHz, CDCl<sub>3</sub>)  $\delta$ : 7.98-7.96 (br s, 1H, NH), 7.57 (d,  $J = 7.8$ , Hz, 1H, 9-H), 7.33 (s, 1H, 3-H), 6.55 (d,  $J = 2.5$  Hz, 1H, 6-H), 6.52 (dd,  $J = 7.8, 2.5$  Hz, 1H, 8-H), 3.78 (s, 3H, OCH<sub>3</sub>), 1.61 ppm (s, 6H, OC(CH<sub>3</sub>)<sub>2</sub>); <sup>13</sup>C-NMR (101 MHz, CDCl<sub>3</sub>)  $\delta$ : 161.3 (7-C), 154.6 (5a-C), 125.6 (9b-C), 123.7 (3-C), 123.1 (3a-C), 120.2 (9-C), 109.9 (8-C), 108.1 (6-C), 103.2 (9a-C), 76.2 (OC(CH<sub>3</sub>)<sub>2</sub>), 55.5 (OCH<sub>3</sub>), 29.4 (OC(CH<sub>3</sub>)<sub>2</sub>); HPLC-MS: [A, 15→95%],  $t_R$ : 4.09 min, (98%); MS (ES<sup>+</sup>,  $m/z$ ) 231 [M + H]<sup>+</sup>.

- (1) Zhu, M.; Kim, M. H.; Lee, S.; Bae, S. J.; Kim, S. H.; Park, S. B. Discovery of novel benzopyranyl tetracycles that act as inhibitors of osteoclastogenesis induced by receptor activator of NF- $\kappa$ B ligand. *J. Med. Chem.* **2010**, *53*, 8760–8764.
- (2) Camps, F.; Coll, J.; Messeguer, A.; Pericás, M. A.; Ricart, S.; Bowers, W. S.; Soderlund, D. M. An Improved Procedure for the Preparation of 2,2-Dimethyl-4-chromanones. *Synthesis (Stuttg.)* **1980**, *1980*, 725–727.
- (3) An, H.; Eum, S.-J.; Koh, M.; Lee, S. K.; Park, S. B. Diversity-oriented synthesis of privileged benzopyranyl heterocycles from *s*-cis-enones. *J. Org. Chem.* **2008**, *73*, 1752–1761.
- (4) Brown, R. E.; Shavel, J. J. Substituted Benzopyranopyrazoles **1971**, Patent US19690826656.
